# Supplementary material for: Endothelial‐specific telomerase inactivation causes telomere‐independent cell senescence and multi‐organ dysfunction characteristic of aging
Source: PubMed Central journal article supplement (PMC11296101; doi:10.1111/acel.14138), 2024-03-12
Supplement: ACEL-23-e14138-s002.pdf [file ACEL-23-e14138-s002.pdf]

## a Most downregulated

| gene_name     | gene_biotype   | gene_description                                                                       | log2 FoldChange | p value  | Gene function suggesting a role in Tert KO response |
|---------------|----------------|----------------------------------------------------------------------------------------|-----------------|----------|-----------------------------------------------------|
| Inpp5j        | protein_coding | inositol polyphosphate 5-phosphatase J [Source:MGI Symbol;Acc:MGI:2158663]             | -9.85848889     | 3.16E-15 | Promotion of angiogenesis                           |
| Il17rc        | protein_coding | interleukin 17 receptor C [Source:MGI Symbol;Acc:MGI:2159336]                          | -9.85848889     | 3.16E-15 | Promotion of angiogenesis                           |
| Nrn1          | protein_coding | neuritin 1 [Source:MGI Symbol;Acc:MGI:1915654]                                         | -9.85848889     | 3.16E-15 | EC migration                                        |
| Rom1          | protein_coding | rod outer segment membrane protein 1 [Source:MGI Symbol;Acc:MGI:97998]                 | -9.911544053    | 1.57E-15 | Adhesion                                            |
| Celf4         | protein_coding | CUGBP, Elav-like family member 4 [Source:MGI Symbol;Acc:MGI:1932407]                   | -9.911544053    | 1.57E-15 | RNA-binding, alternative splicing                   |
| Myo1d         | protein_coding | myosin ID [Source:MGI Symbol;Acc:MGI:107728]                                           | -9.928804211    | 1.12E-15 | Cell-cell signaling and cell migration              |
| 1700019D03Rik | protein_coding | RIKEN cDNA 1700019D03 gene [Source:MGI Symbol;Acc:MGI:1914330]                         | -9.945860311    | 9.45E-16 | Predicted to regulate PKA                           |
| Vegfc         | protein_coding | vascular endothelial growth factor C [Source:MGI Symbol;Acc:MGI:109124]                | -9.96271712     | 7.99E-16 | Lymph-angiogenesis                                  |
| Pnma1         | protein_coding | paraneoplastic antigen MA1 [Source:MGI Symbol;Acc:MGI:2180564]                         | -9.96271712     | 7.99E-16 | Cell viability, inhibits apoptosis                  |
| Msa47         | protein_coding | membrane-spanning 4-domains, subfamily A, member 7 [Source:MGI Symbol;Acc:MGI:1918846] | -9.979379243    | 5.74E-16 | Signal transduction                                 |
| Ipp           | protein_coding | IAP promoted placental gene [Source:MGI Symbol;Acc:MGI:96581]                          | -9.995851126    | 4.87E-16 | Actin-binding                                       |
| Tmem237       | protein_coding | transmembrane protein 237 [Source:MGI Symbol;Acc:MGI:2138365]                          | -10.01213706    | 3.51E-16 | Cilia                                               |
| Dusp14        | protein_coding | dual specificity phosphatase 14 [Source:MGI Symbol;Acc:MGI:1927168]                    | -10.05992003    | 1.86E-16 | VEGF-regulated                                      |
| Pard6g        | protein_coding | par-6 family cell polarity regulator gamma [Source:MGI Symbol;Acc:MGI:2135606]         | -10.09091817    | 1.36E-16 | Cell polarity, tight junctions                      |
| Lrrc18        | protein_coding | leucine rich repeat containing 18 [Source:MGI Symbol;Acc:MGI:1914830]                  | -10.106171      | 9.96E-17 | Marker of coronary artery disease                   |
| Flrt2         | protein_coding | fibronectin leucine rich transmembrane protein 2 [Source:MGI Symbol;Acc:MGI:3603594]   | -10.12126426    | 8.55E-17 | Inter-endothelial adhesion                          |
| Klf8          | protein_coding | Kruppel-like factor 8 [Source:MGI Symbol;Acc:MGI:2442430]                              | -10.12126426    | 8.55E-17 | VEGFA and Cyclin D activator                        |
| 0610039K10Rik | antisense      | RIKEN cDNA 0610039K10 gene [Source:MGI Symbol;Acc:MGI:3915636]                         | -10.12126426    | 8.55E-17 | Unknown                                             |
| A630072L19Rik | antisense      | RIKEN cDNA A630072L19 gene [Source:MGI Symbol;Acc:MGI:3641830]                         | -10.12126426    | 8.55E-17 | Unknown                                             |
| Tert          | protein_coding | telomerase reverse transcriptase [Source:MGI Symbol;Acc:MGI:1202709]                   | -10.36898724    | 2.45E-18 | <b>Telomerase reverse transcriptase</b>             |
| Mcf2l         | protein_coding | mcf.2 transforming sequence-like [Source:MGI Symbol;Acc:MGI:103263]                    | -10.41870329    | 1.27E-18 | G exchange Rho/Rac co-factor                        |
| Slc24a1       | protein_coding | solute carrier family 24, member 1 [Source:MGI Symbol;Acc:MGI:2384871]                 | -10.43086915    | 9.85E-19 | Ca/K transport                                      |
| Actn3         | protein_coding | actinin alpha 3 [Source:MGI Symbol;Acc:MGI:99678]                                      | -10.65484207    | 3.89E-20 | Muscle metabolism                                   |
| Igkv6-15      | IG_V_gene      | immunoglobulin kappa variable 6-15 [Source:MGI Symbol;Acc:MGI:1330831]                 | -10.79320696    | 5.03E-21 | Immunoglobulin kappa variable chain                 |

## Most upregulated

| gene_name | gene_biotype   | gene_description                                                                                   | log2 FoldChange | p value  | Gene function suggesting a role in Tert KO response    |
|-----------|----------------|----------------------------------------------------------------------------------------------------|-----------------|----------|--------------------------------------------------------|
| Selenoo   | protein_coding | selenoprotein O [Source:MGI Symbol;Acc:MGI:1919007]                                                | 11.02069037     | 1.75E-20 | Redox activity, mitochondrial function                 |
| Mir6395   | miRNA          | microRNA 6395 [Source:MGI Symbol;Acc:MGI:5530943]                                                  | 10.50034444     | 3.00E-17 | Reduced by LPS treatment                               |
| Itga3     | protein_coding | integrin alpha 3 [Source:MGI Symbol;Acc:MGI:96602]                                                 | 10.48197868     | 3.79E-17 | Immune cell infiltration                               |
| Ccdc34    | protein_coding | coiled-coil domain containing 34 [Source:MGI Symbol;Acc:MGI:1915451]                               | 10.16649661     | 2.85E-15 | Proliferation                                          |
| Zfyve21   | protein_coding | zinc finger, FYVE domain containing 21 [Source:MGI Symbol;Acc:MGI:1915770]                         | 10.16644961     | 2.85E-15 | Transcription factor                                   |
| Zcchc10   | protein_coding | zinc finger, CCHC domain containing 10 [Source:MGI Symbol;Acc:MGI:1196228]                         | 10.11969678     | 5.00E-15 | Transcription factor                                   |
| Snhg6     | lincRNA        | small nucleolar RNA host gene 6 [Source:MGI Symbol;Acc:MGI:1921074]                                | 10.1117552      | 5.76E-15 | Modulates oxidized LDL-induced endothelial cell injury |
| Paq8r     | protein_coding | progesterin and adipoQ receptor family member VIII [Source:MGI Symbol;Acc:MGI:1921479]             | 10.08766471     | 7.67E-15 | arrests endothelial cell cycle                         |
| Zbtb8a    | protein_coding | zinc finger and BTB domain containing 8a [Source:MGI Symbol;Acc:MGI:1920930]                       | 10.04659783     | 1.38E-14 | Transcription factor                                   |
| Ptp4a1    | protein_coding | protein tyrosine phosphatase 4a1 [Source:NCBI gene;Acc:19243]                                      | 10.02983807     | 1.60E-14 | Suppressor of vascular inflammation                    |
| Ldhd      | protein_coding | lactate dehydrogenase D [Source:MGI Symbol;Acc:MGI:106428]                                         | 10.00432762     | 2.50E-14 | Glycolysis                                             |
| Rdh5      | protein_coding | retinol dehydrogenase 5 [Source:MGI Symbol;Acc:MGI:1201412]                                        | 9.960781441     | 3.95E-14 | Lipid metabolism                                       |
| Adcy5     | protein_coding | adenylate cyclase 5 [Source:MGI Symbol;Acc:MGI:99673]                                              | 9.831357826     | 2.28E-13 | Generation of cAMP, linked with decreased longevity    |
| Aspm      | protein_coding | abnormal spindle microtubule assembly [Source:MGI Symbol;Acc:MGI:1334448]                          | 9.79214208      | 3.18E-13 | Cell division                                          |
| Ndnf      | protein_coding | neuron-derived neurotrophic factor [Source:MGI Symbol;Acc:MGI:1915419]                             | 9.782169292     | 3.77E-13 | Ischemia-induced revascularization                     |
| C7        | protein_coding | complement component 7 [Source:MGI Symbol;Acc:MGI:88235]                                           | 9.772127085     | 4.46E-13 | Trap for assembling terminal complement complex        |
| Plg2g12a  | protein_coding | phospholipase A2, group XIIA [Source:MGI Symbol;Acc:MGI:1913600]                                   | 9.762014487     | 5.29E-13 | Fatty acid synthesis, injures lymphatic endothelium    |
| Alg11     | protein_coding | asparagine-linked glycosylation 11 (a-1,2-mannosyltransferase) [Source:MGI Symbol;Acc:MGI:2142632] | 9.762014487     | 5.29E-13 | Glycosylation                                          |
| Hist2h2ac | protein_coding | histone cluster 2, H2ac [Source:MGI Symbol;Acc:MGI:2448316]                                        | 9.762014487     | 5.29E-13 | Nucleosome                                             |
| Zfp975    | protein_coding | zinc finger protein 975 [Source:MGI Symbol;Acc:MGI:3648690]                                        | 9.751830504     | 5.29E-13 | Transcription factor                                   |
| Clsnp     | protein_coding | claspin [Source:MGI Symbol;Acc:MGI:2445153]                                                        | 9.731244301     | 8.03E-14 | Genotoxic stress signaling, DNA replication            |
| Fam171b   | protein_coding | family with sequence similarity 171, member B [Source:MGI Symbol;Acc:MGI:2444579]                  | 9.731244301     | 8.03E-14 | Stabilizes vimentin and enhances TAM infiltration      |
| Rragb     | protein_coding | Ras-related GTP binding B [Source:MGI Symbol;Acc:MGI:3038613]                                      | 9.720839985     | 9.58E-14 | Guanine-binding protein                                |
| Ntocr     | protein_coding | nucleoside-triphosphatase, cancer-related [Source:MGI Symbol;Acc:MGI:1913816]                      | 9.71036009      | 9.58E-14 | Anti-oxidant enzyme activated by oxidative stress      |

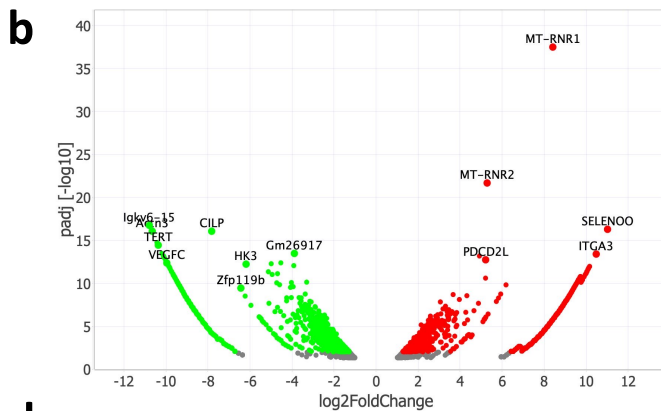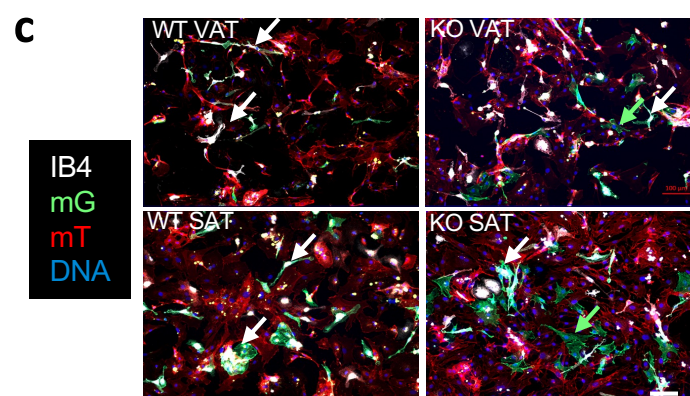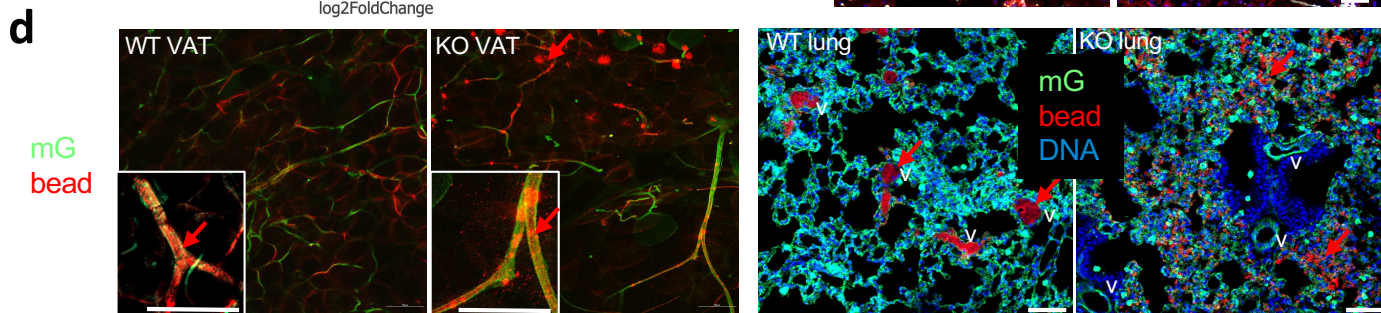

**Supplementary Figure S1.** (a-b) RNAseq analysis on mG+ isolated from SAT of KO vs WT littermates raised on HFD. Data are reported in Gao et al., *Front Cell Dev Biol* 2023 and deposited in GEO (accession GSE239686, Token: shifuooipzapzwr). Listed are the most KO-downregulated and KO-upregulated 24 genes. (b) Volcano plot (IPA) demonstrates *Tert* to be among the most downregulated genes in SAT EC of KO mice, validating knockout efficiency. (c) SVC from WT and KO VAT and SAT stained with isolectin B4 (IB4) showing that some of the KO mG+ cells are IB4-negative and have fibroblast, rather than EC, morphology. (d) After injection of 200  $\mu$ l of 0.2% red fluorescent FluoSphere (Invitrogen F8801) microbeads (bead), 30 min later VAT whole mounts (left) and lung frozen sections (right) were analyzed for bead distribution. Arrows: bead fluorescence inside WT vessels (v) and outside (KO). Scale bar: 100  $\mu$ m.

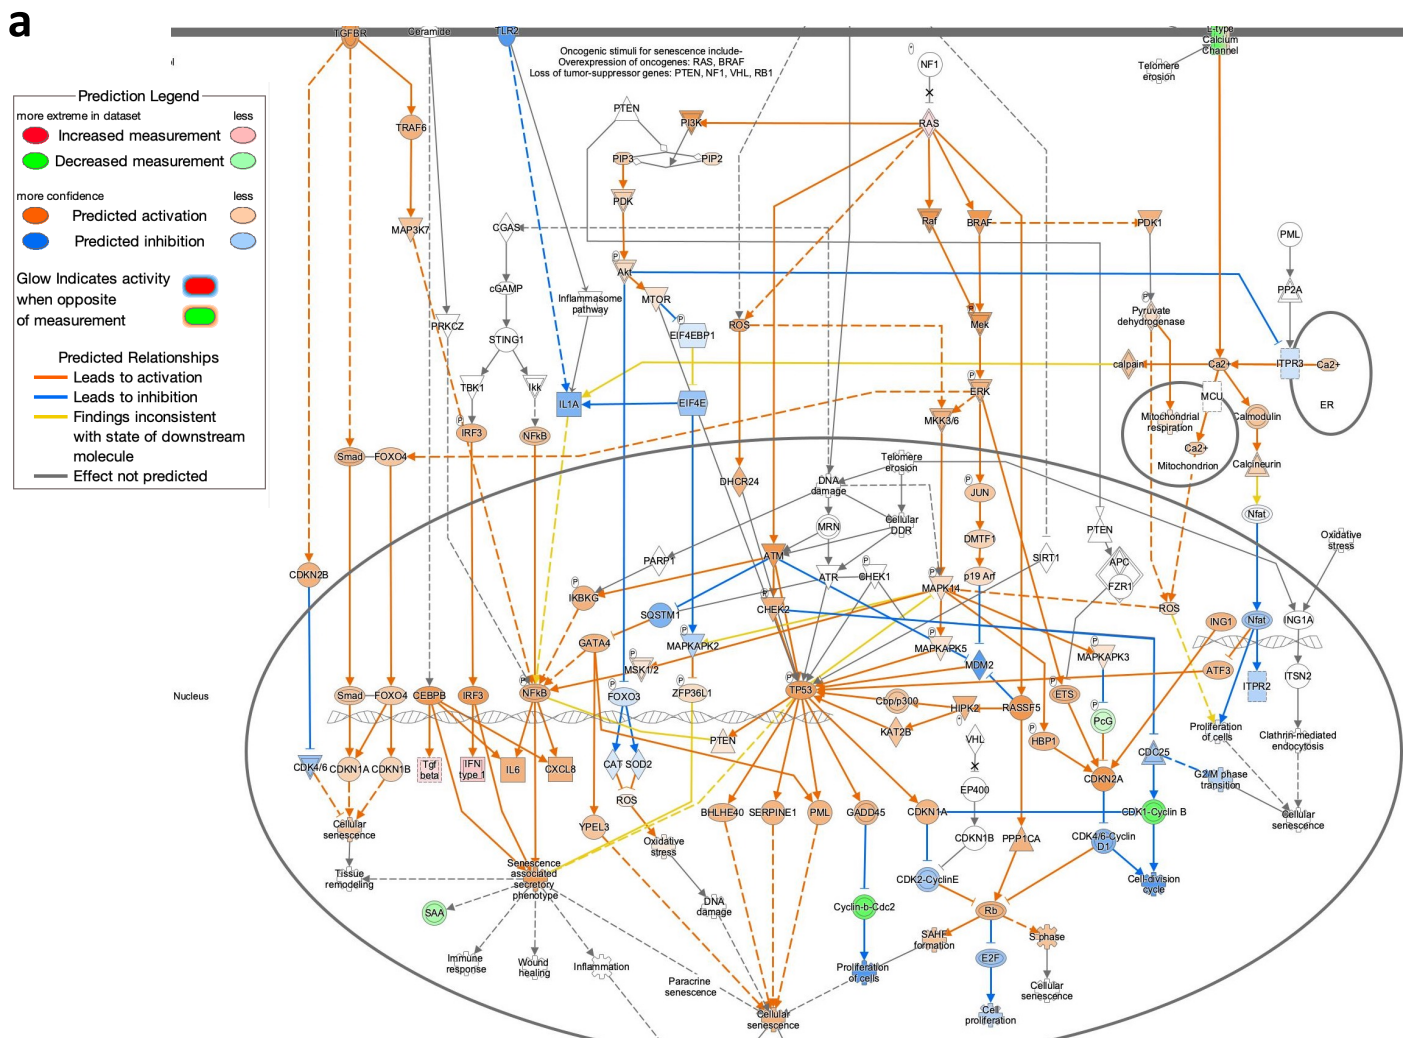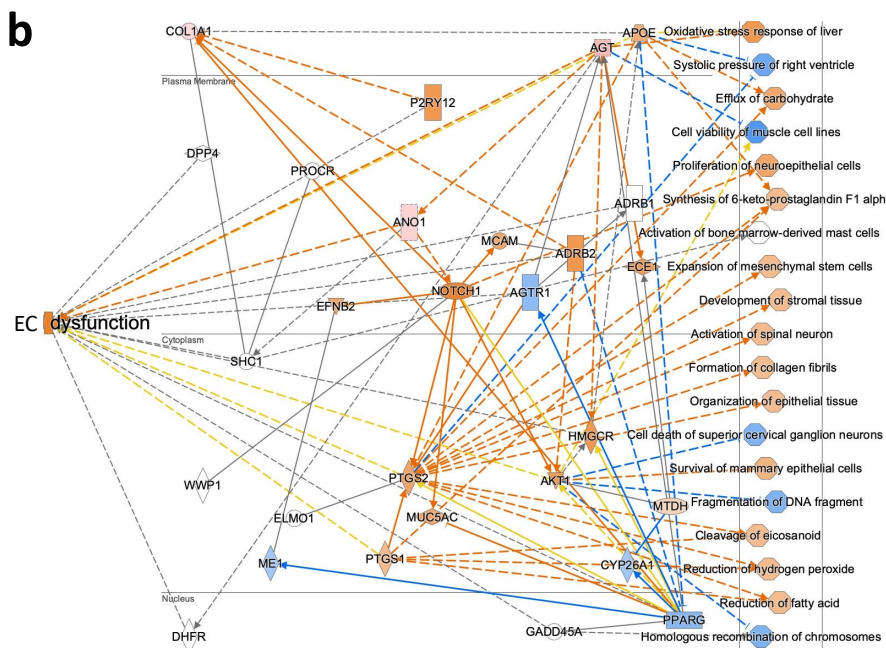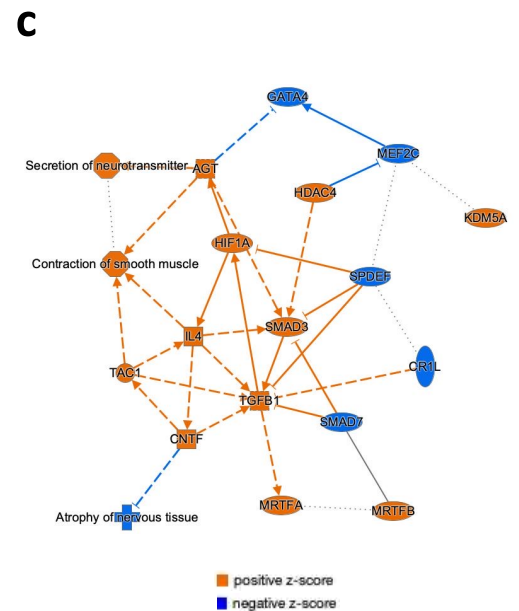

**Supplementary Figure S2.** EC *Tert* KO results in adipose EC senescence and dysfunction, as detected by Ingenuity Pathway Analysis (IPA) of RNAseq data available at GEO database (accession GSE239686, Token: shifuooipzapzwr) and reported in Gao et al., *Front Cell Dev Biol* 2023. (a) Senescence-related pathways upregulated in VAT EC of EC-TERT KO mice fed chow, compared to WT EC. (b) EC dysfunction-related pathways upregulated in VAT EC of EC-TERT KO mice fed chow, compared to WT EC. (c) Top canonical pathways deregulated in VAT EC of EC-TERT KO mice fed chow, compared to WT EC.

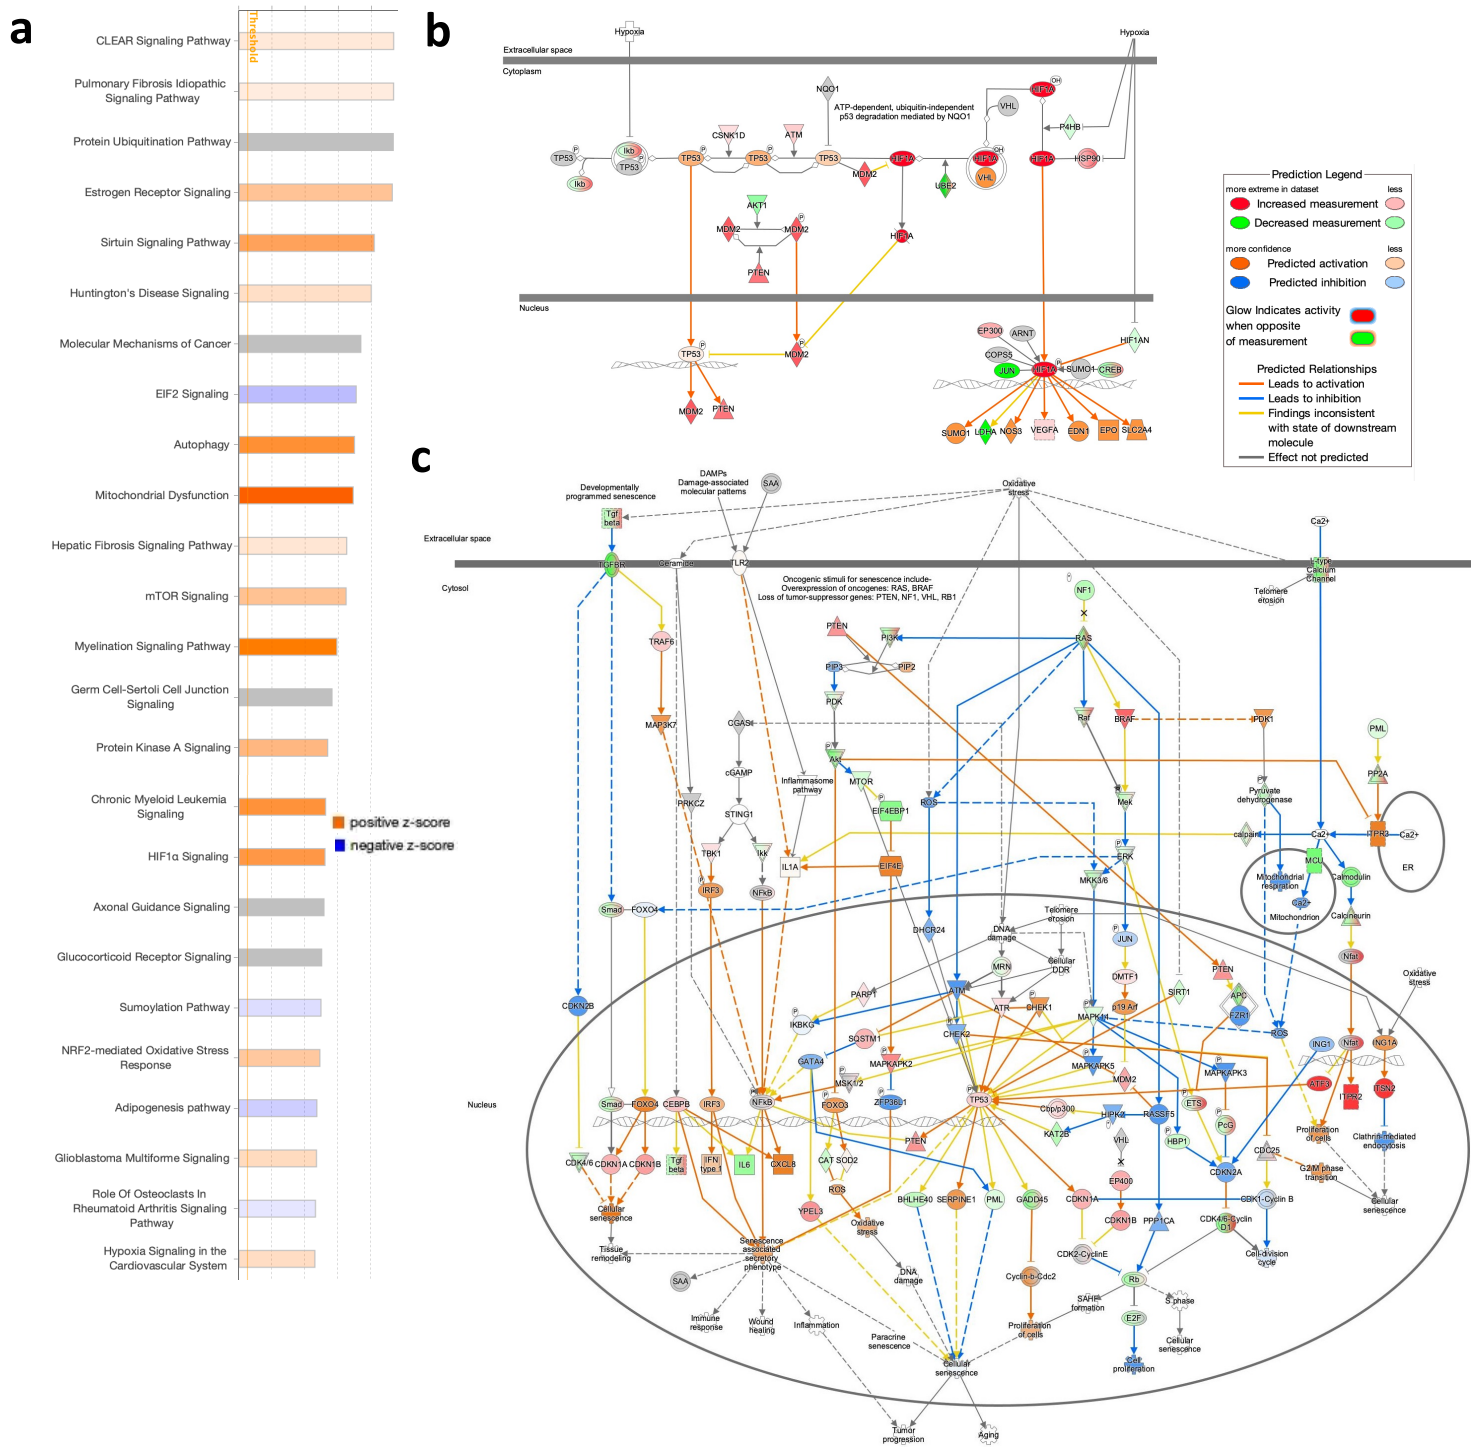

**Supplementary Figure S3.** EC *Tert* KO-induced hypoxia affects other cells in AT, as determined by scRNAseq on SAT of EC-*Tert*-KO and WT mice fed HFD for 5 months as described and reported in Gao et al., *Front Cell Dev Biol* 2023. cDNAs were generated using oligo-T primers without rRNA depletion. Single cell capture and library construction were performed with the Chromium Single Cell 3' Reagent Kit v3.1. Sequencing was done with Illumina NextSeq 550 System using High Output Kit v2.5 (50,000 reads / cell). Cell Ranger Single Cell Software Suite v3.1.0 was used to perform bioinformatic analysis against mouse transcriptome (mm10, Ensembl 93) with STAR. Raw read count tables were analyzed using the Seurat (v3.1.1) on R platform (3.5.2). FindVariableGenes was used to calculate the principal components. Cell clusters were identified using the Shared Nearest Neighbor (SNN) algorithm with a resolution parameter 0.8. Transcriptomes of adipose stromal cells (ASC), were compared by IPA. (a) A list of signaling networks activates (orange) or inactivated (blue) in ASC from SAT of EC-*Tert*-KO mice. (b) Analysis focusing on hypoxia-related pathways showing upregulation of senescence markers in ASC from VAT of EC-*Tert*-KO mice. (c) Analysis focusing on senescence-related pathways showing upregulation of senescence markers in ASC from SAT of EC-*Tert*-KO mice. Full data are available at GEO database (accession GSE239687, Token: gxqdeiugjibn).
